# Supplementary material for: Efficient immobilization and bidirectional catalysis of polysulfide conversion by FeCoP quantum dots for lithium–sulfur batteries
Source: Royal Society of Chemistry journal article supplement (doi:10.1039/d3ta01569f), 2023-01-01
Supplement: d3ta01569f1.pdf [file d3ta01569f1.pdf]

## Efficient Immobilization and Bidirectional Catalysis of Polysulfide Conversion by FeCoP Quantum Dot for Lithium-sulfur Batteries

Minhui Li<sup>a,1</sup>, Xiao Xu<sup>a,1</sup>, Hui Wang<sup>a,\*</sup>, Xuyun Wang<sup>a</sup>, Xianguo Ma<sup>b</sup>, Jianwei Ren<sup>c,\*</sup>, Rongfang  
Wang<sup>a,\*</sup>

### Experimental

#### Visualized Adsorption of Polysulfides

Li<sub>2</sub>S<sub>6</sub> solution was selected as a representative of polysulfides, which was prepared by mixing Li<sub>2</sub>S and sulfur with a molar ratio of 1:5 in a solution containing 1,3-dioxolane (DOL) and 1,2-dimethoxyethane (DME) (v/v = 1/1) under vigorous stirring. Then, NCS, FeCo-NCS and FeCo-NCS samples were added separately into the as-prepared Li<sub>2</sub>S<sub>6</sub> solution to evaluate their adsorption abilities.

#### Assembly and Measurements of Symmetric Cells

To prepare the sulfur-free electrodes for symmetric cells, the active materials (NCS, FeCo-NCS and FeCo-NCS) were ground with Super P and PVDF binder in a weight ratio of 8:1:1 in NMP solvent to form a slurry and coated onto Al foil. Then the electrodes were punched into disks with a diameter of 10 mm and the areal loading of electrodes disks were around 0.6 mg cm<sup>-2</sup>. The Li<sub>2</sub>S<sub>6</sub> electrolyte was prepared by dissolving Li<sub>2</sub>S and sulfur with a molar ratio of 1:5 in a mixed solvent of DOL/DME (v/v = 1/1) with bis(trifluoromethanesulfonyl)imide lithium (LiTFSI, 1.0 M) and LiNO<sub>3</sub> (1.0 wt%) under vigorous stirring. The symmetric cells were assembled by sandwiching a Celgard 2400 polypropylene separator (diameter = 12 mm) between two identical sulfur-free electrodes (NCS, FeCo-NCS and FeCo-NCS) with 40 μL Li<sub>2</sub>S<sub>6</sub> electrolyte in a CR2032 coin cell. Both CV and EIS were conducted on a CHI 760E workstation.

#### Measurements for the Li<sub>2</sub>S Deposition

The Li<sub>2</sub>S<sub>8</sub> electrolyte was prepared by dissolving the Li<sub>2</sub>S and sulfur with a molar ratio of 1:7 in tetraglyme solvent with LiTFSI (1.0 M) under vigorous stirring. The cells were assembled by sandwiching a Celgard 2400 polypropylene separator between the sulfur-free electrodes (NCS, FeCo-NCS and FeCo-NCS) and Li foil in a CR2032 coin cell.

The  $\text{Li}_2\text{S}_8$  electrolyte was dropped onto the sulfur-free electrodes, while the blank electrolyte without  $\text{Li}_2\text{S}_8$  was added in the Li foil side. The assembled cells were galvanostatically discharged at 0.112 mA to 2.06 V, and subsequently kept potentiostatically discharged at 2.05 V.

### **Measurements for the $\text{Li}_2\text{S}$ Dissolution**

The cells identical to those in the above tests of  $\text{Li}_2\text{S}$  deposition were employed for the tests of  $\text{Li}_2\text{S}$  dissolution. The cells were firstly galvanostatically discharged at 0.10 mA to 1.80 V, and subsequently galvanostatically discharged at 0.01 mA to 1.80 V for full transformation of S species into solid  $\text{Li}_2\text{S}$ . Then the cells were potentiostatically charged at 2.40 V.

### **Assembly and Measurements of Li–S Cells**

To prepare the cathode, S@NCS, Super P, and PVDF binder were mixed in a mass ratio of 70:20:10 to form a homogeneous slurry. Then, the slurry was coated on Al foil and dried at 60 °C for 12 h to obtain S@NCS cathode (diameter = 10 mm). The routine mass loading of sulfur in the electrode is about 1 mg  $\text{cm}^{-2}$  (4.5 mg  $\text{cm}^{-2}$  for high S loading test). CR2032 coin cells were assembled by employing the as-prepared sulfur cathodes, Celgard 2400 polypropylene separator (diameter = 12 mm), and Li foil as the anode. The electrolyte was LiTFSI (1.0 M) in a mixed solvent of DOL/DME (v/v=1/1) with  $\text{LiNO}_3$  (1.0wt%). The electrolyte/sulfur (E/S) ratio is about 40  $\mu\text{L mg}^{-1}$  unless otherwise noted (4  $\mu\text{L mg}^{-1}$  for lean electrolyte test). The galvanostatic charge/discharge (GCD) tests were measured using a Neware battery system within a voltage window of 1.7–2.8 V. The current density is defined as 1 C = 1675 mA  $\text{g}^{-1}$ . CV tests were conducted between 1.7 and 2.8 V. EIS was performed in the frequency range of 0.01 Hz to 100 kHz.

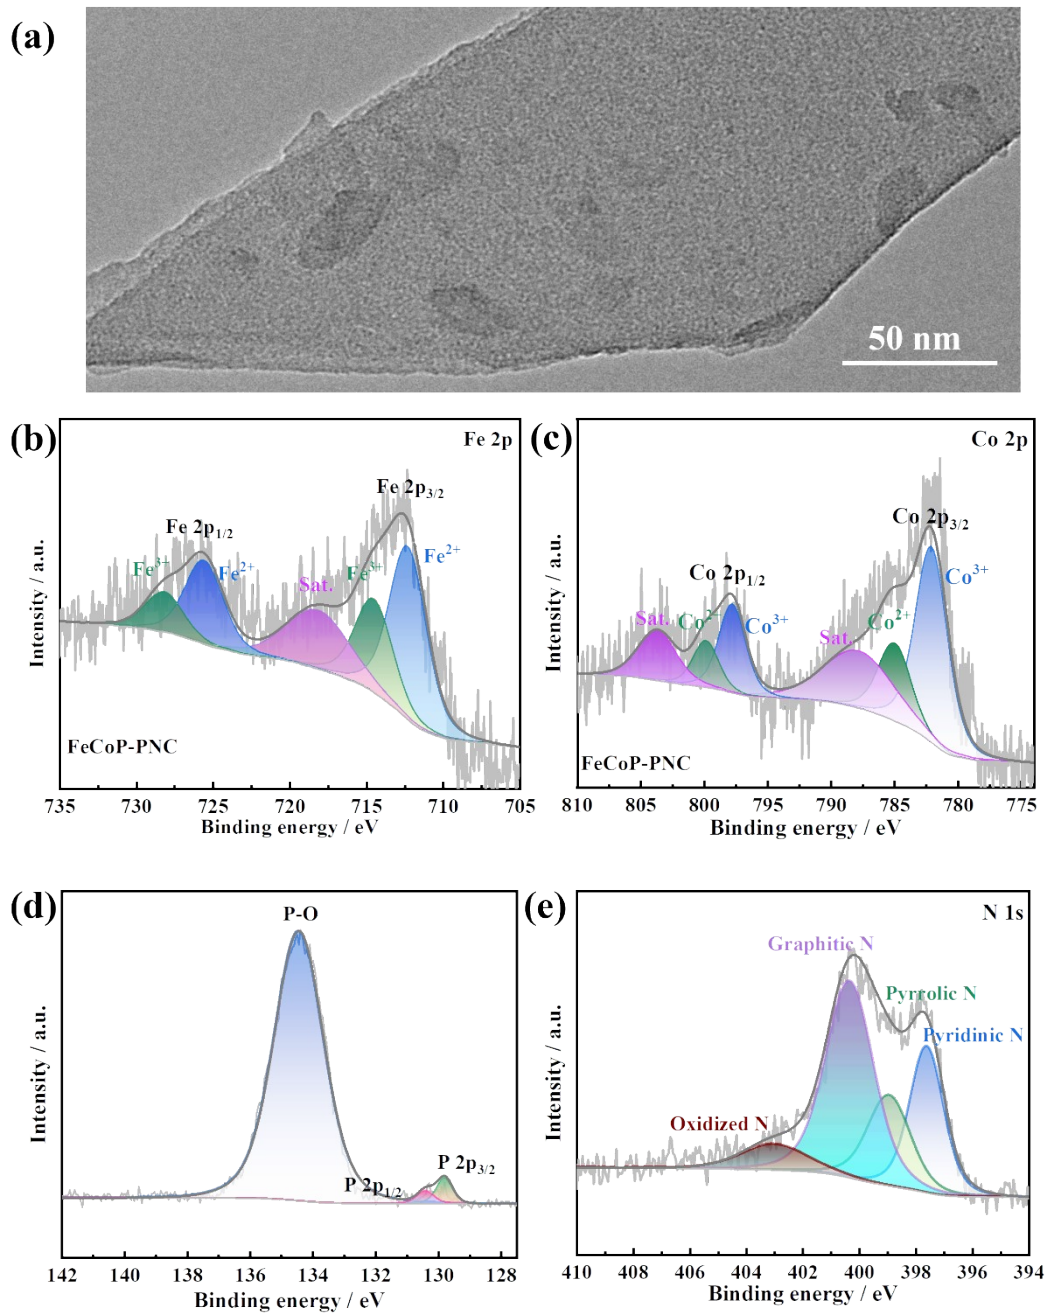

**Fig. S1.** (a) TEM image of NCS; High-resolution XPS spectra of (b) Fe 2p, (c) Co 2p and (d) P 2p and (e) N1s.

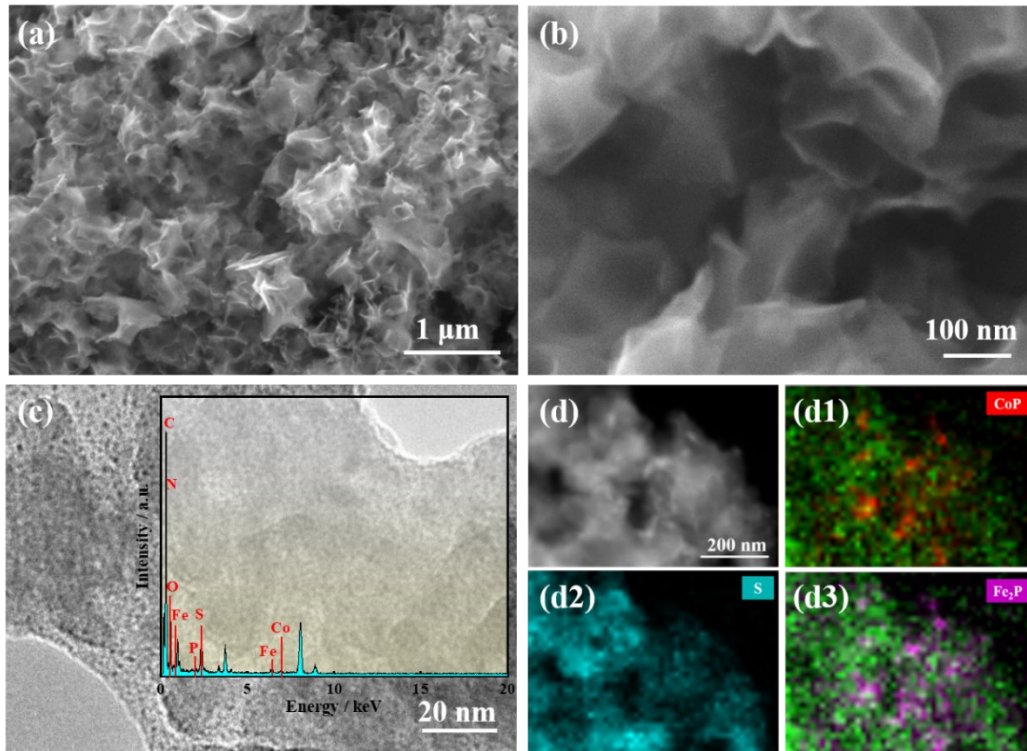

**Fig. S2.** (a, b) SEM and (c) TEM images on different scales (Insert: EDX spectrum); (d) STEM image and the high magnification elemental mapping images of S@FeCoP-NCS sample.

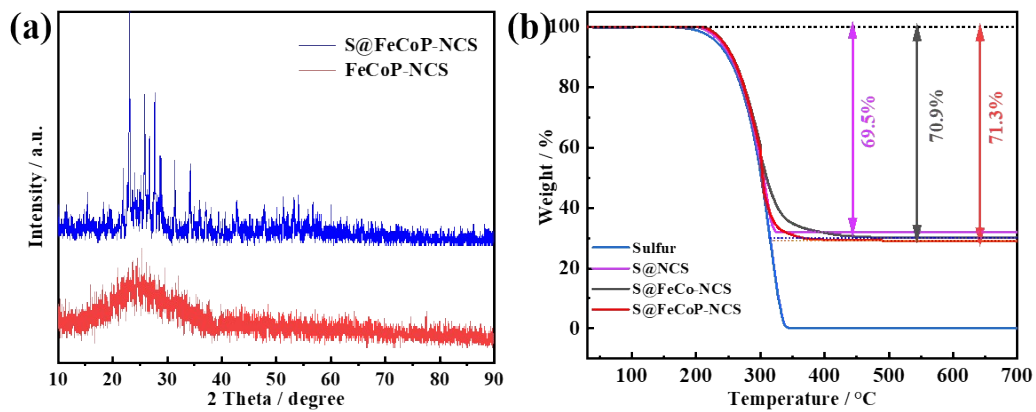

**Fig. S3.** (a) XRD patterns of S@FeCoP-NCS sample; (b) TGA curve of S@NCS, S@FeCo-NCS and S@FeCoP-NCS samples with 70% S-loading under a nitrogen atmosphere from 25 °C to 600 °C.

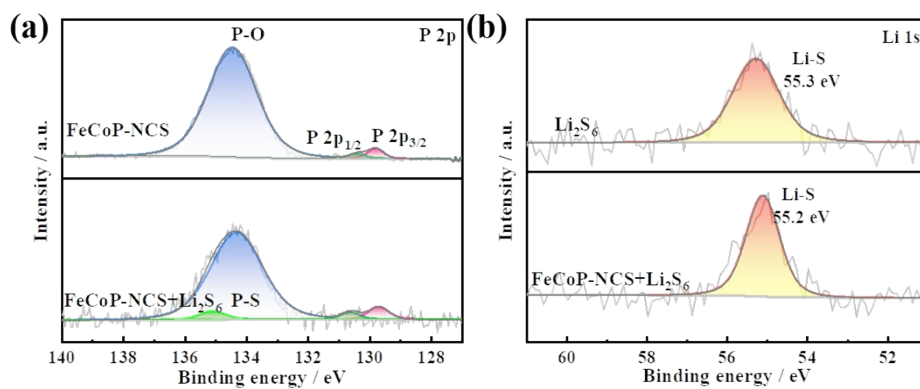

**Fig. S4.** (a) XPS spectra of P 2p before and after adsorbing Li<sub>2</sub>S<sub>6</sub>; (b) Li 1s of pristine Li<sub>2</sub>S<sub>6</sub> and Li<sub>2</sub>S<sub>6</sub>@FeCoP-NCS composite before and after absorption.

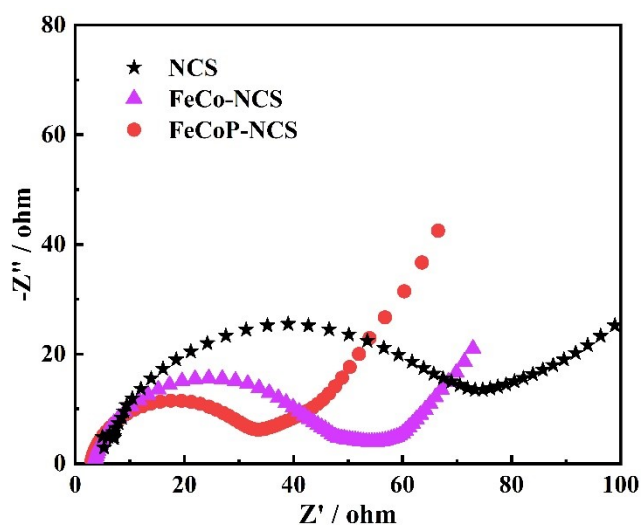

**Fig. S5.** EIS spectra of Li-S cells with S@NCS, S@FeCo-NCS and S@FeCoP-NCS electrodes.

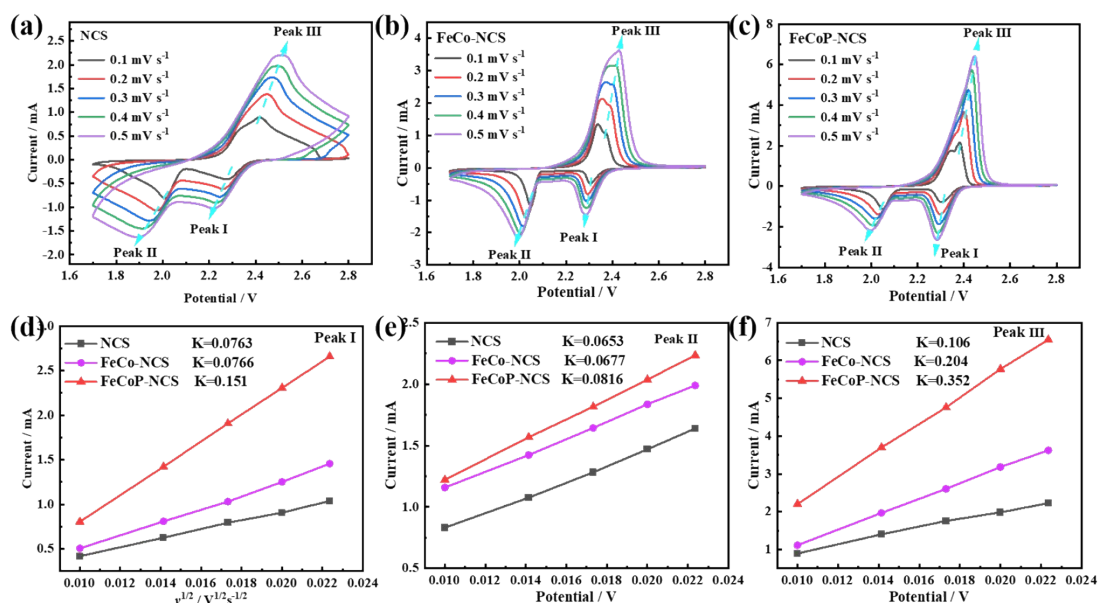

**Fig. S6.** Lithium-ion diffusion characteristics of the fabricated electrodes at different voltage scan rates. (a-c) CV curves of the S@NCS, S@FeCo-NCS and S@FeCoP-NCS electrodes; (d-f) cathodic reduction process and anodic oxidation process against the square root of the scan rates.

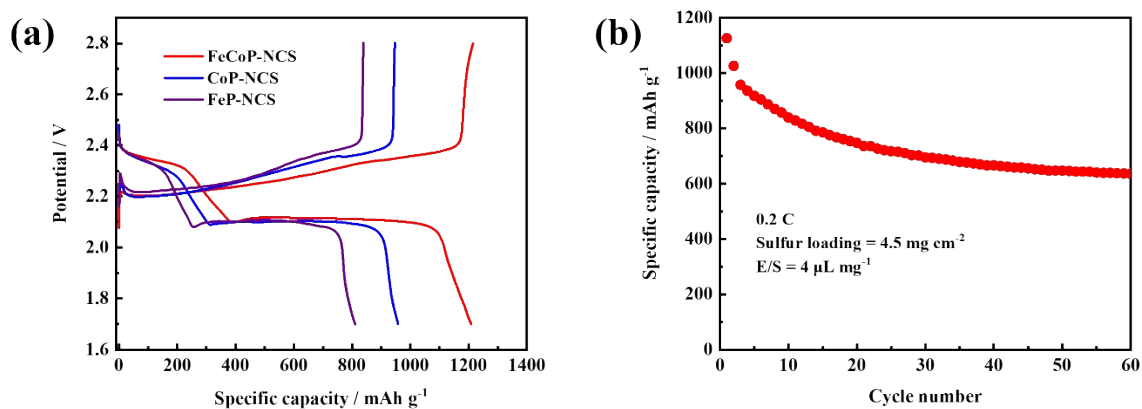

**Fig. S7.** (a) the first charge and discharge profiles of S@FeCoP-NCS, S@CoP-NCS and S@FeP-NCS cathodes; (b) cycling performance of S@FeCoP-NCS cathode with high sulfur loadings and lean electrolyte at 0.2 C.

**Table S1.** Diffusion coefficient of Li<sup>+</sup> on S@NCS, S@FeCo-NCS and S@FeCoP-NCS electrodes.

|             | Peak I                | Peak II               | Peak III              |
|-------------|-----------------------|-----------------------|-----------------------|
| S@NCS       | 1.97*10 <sup>-7</sup> | 1.44*10 <sup>-7</sup> | 3.81*10 <sup>-7</sup> |
| S@FeCo-NCS  | 1.99*10 <sup>-7</sup> | 1.55*10 <sup>-7</sup> | 1.41*10 <sup>-6</sup> |
| S@FeCoP-NCS | 7.73*10 <sup>-7</sup> | 2.26*10 <sup>-7</sup> | 4.20*10 <sup>-6</sup> |

**Table S2.** Comparison of S@FeCoP-NCS assembled LSB performance with other electrodes reported in literature.

| Sulfur cathodes             | Current density | Cycle number | Remaining capacity      | Capacity retention | Ref.      |
|-----------------------------|-----------------|--------------|-------------------------|--------------------|-----------|
| C/S/InOOH                   | 2 C             | 500          | 558 mAh g <sup>-1</sup> | 69.5%              | 1         |
| S/PPy-MnO <sub>2</sub>      | 1 C             | 500          | 550 mAh g <sup>-1</sup> | 64.7%              | 2         |
| FMCTF-S                     | 1 C             | 400          | 426 mAh g <sup>-1</sup> | 62.6%              | 3         |
| NPC/MoO <sub>2</sub> @S     | 1 C             | 500          | 503 mAh g <sup>-1</sup> | 63.3%              | 4         |
| S-AQ-G                      | 0.5 C           | 500          | 550 mAh g <sup>-1</sup> | 65.0%              | 5         |
| S/SnP <sub>0.94</sub> @PHCA | 0.5 C           | 300          | 442 mAh g <sup>-1</sup> | 62.2%              | 6         |
| S@FeCoP-NCS                 | 1 C             | 500          | 605 mAh g <sup>-1</sup> | 72.6%              | This work |

## References

1. T. Zhao, J. Chen, K. Dai, M. Yuan, J. Zhang, S. Li, Z. Liu, H. He, C. Yang and G. Zhang, *J. Colloid Interface Sci.*, 2022, **610**, 418-426.
2. J. Zhang, Y. Shi, Y. Ding, W. K. Zhang and G. H. Yu, *Nano Lett.*, 2016, **16**, 7276-7281.
3. D.-G. Wang, L. Tan, H. Wang, M. Song, J. Wang and G.-C. Kuang, *ChemElectroChem*, 2019, **6**, 2777-2781.
4. H.-Y. Zhou, Z.-Y. Sui, F.-L. Zhao, Y.-N. Sun, H.-Y. Wang and B.-H. Han, *Nanotechnol.*, 2020, **31**, 315601.
5. G. Li, X. Wang, M. H. Seo, M. Li, L. Ma, Y. Yuan, T. Wu, A. Yu, S. Wang, J. Lu and Z. Chen, *Nat. Commun.*, 2018, **9**, 705.
6. X. Gao, Y. Huang, X. Li, H. Gao and T. Li, *Chem. Eng. J.*, 2021, **420**, 129724.
